# Supplementary material for: Identification of enzymatic functions of osmo-regulated periplasmic glucan biosynthesis proteins from Escherichia coli reveals a novel glycoside hydrolase family
Source: PubMed Central journal article supplement (PMC10514313; doi:10.1038/s42003-023-05336-6), 2023-09-21
Supplement: 42003_2023_5336_MOESM3_ESM.pdf [file 42003_2023_5336_MOESM3_ESM.pdf]

## **Description of Additional Supplementary Files**

**File name:** Supplementary Data 1

**Description:** The source data behind the graphs in the paper.
